# Supplementary material
Source: publisher site journal article supplement (https://www.spandidos-publications.com/8446/downloadSupplementary)
Supplement: Supplementary file 1 [file downloadSupplementary]

## Sheet: HS538-3-1288
Table SI. Cell Counting Kit-8 assay of control and CYP17A1 knockout groups.
Time (h)	Control			Knockout
24	0.521525	0.544225	0.534325	0.516125	0.516825	0.526925
48	0.705425	0.708725	0.713325	0.622125	0.623525	0.654625
72	1.22738	1.27297	1.41708	0.709963	0.756141	0.767245
